# Supplementary material for: Apelin enhances IL-1β expression in human synovial fibroblasts by inhibiting miR-144-3p through the PI3K and ERK pathways
Source: publisher site journal article supplement (doi:10.18632/aging.103195), 2020-05-18
Supplement: Supplementary file [file aging-v12i10-103195-supplementary-material-SD1.pdf]

## SUPPLEMENTARY FIGURE

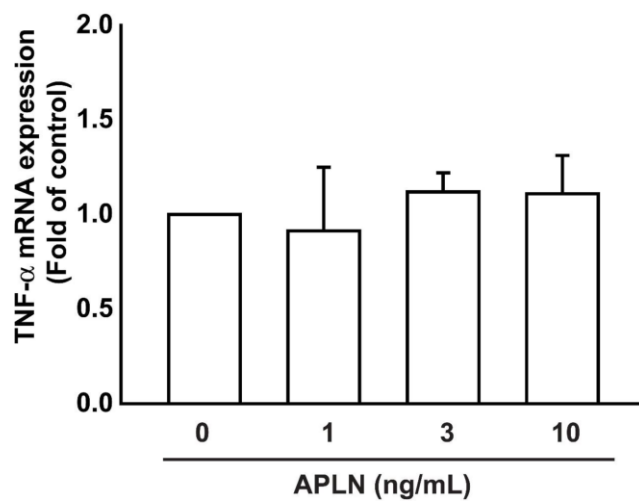

**Supplementary Figure 1. Stimulation of OASFs with APLN did not significantly increase TNF- $\alpha$  expression.** After incubating human OASFs with 0, 1, 3, or 10 ng/mL of APLN for 24 h, TNF- $\alpha$  mRNA expression levels were examined using RT-qPCR analysis (n=4).
